# Supplementary material for: Tailoring of Selenium-Plated Novasomes for Fine-Tuning Pharmacokinetic and Tumor Uptake of Quercetin: In Vitro Optimization and In Vivo Radiobiodistribution Assessment in Ehrlich Tumor-Bearing Mice
Source: MDPI journal article supplement (doi:10.3390/pharmaceutics14040875), 2022-04-16
Supplement: s1 [file s1]

# Supplementary Materials: Tailoring of Selenium-Plated Novasomes for Fine-Tuning Pharmacokinetic and Tumor Uptake of Quercetin: In Vitro Optimization and In Vivo Radiobiodistribution Assessment in Ehrlich Tumor-Bearing Mice

Heba M. Aboud, Amal K. Hussein, Abdallah Z. Zayan, Tarek Saad Makram, Mona O. Sarhan and Dina M. El-Sharawy

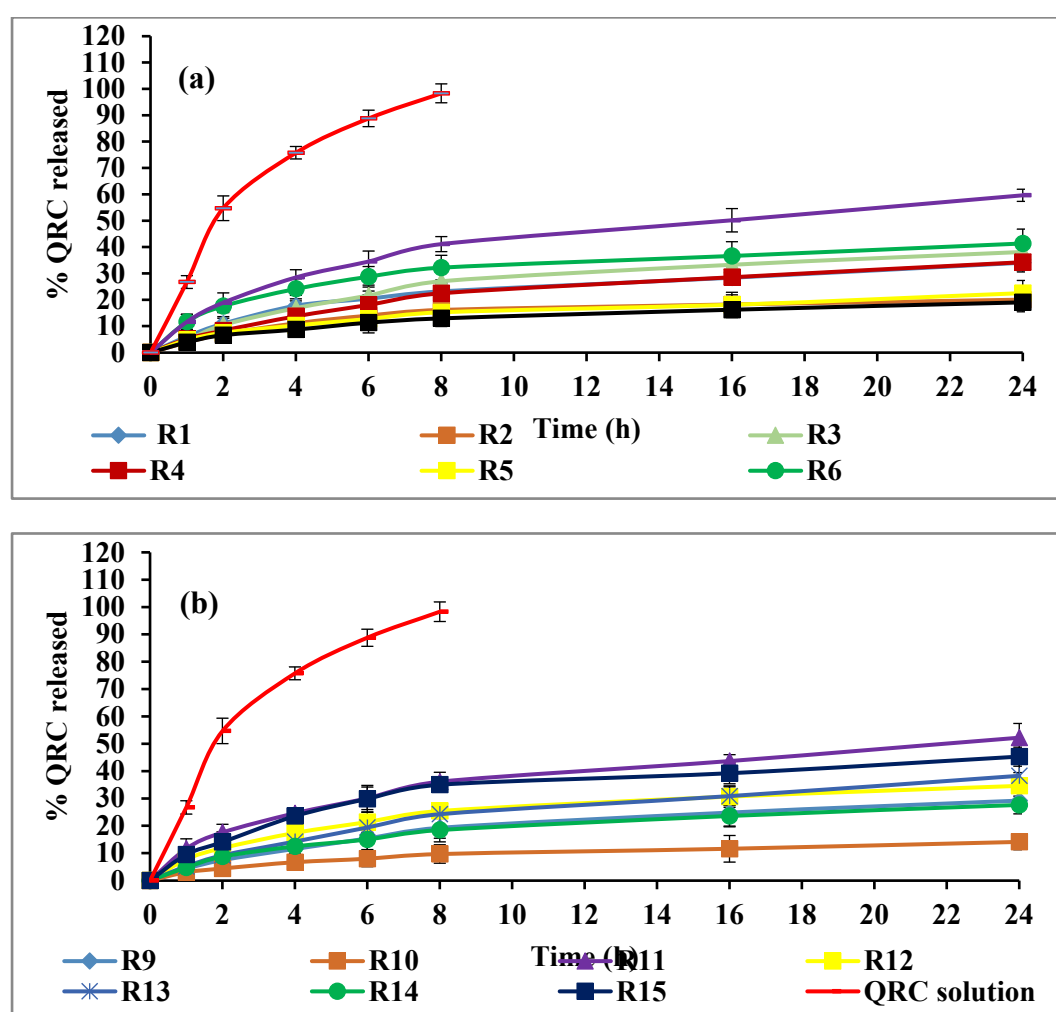

**Figure S1.** In vitro release profiles of QRC from drug solution and different NOV runs: (a) R1–R8 and (b) R9–R15.

**Table S1.** QRC Biodistribution after i.v. administrations of <sup>99m</sup>Tc-QRC solution, <sup>99m</sup>Tc-QRC-NOVs, and <sup>99m</sup>Tc-QRC-SeNOVs to Ehrlich tumor-bearing mice at various time intervals.

| Organ/Tissue                   | Time (h)                   |                            |                            |                             |                             |                             |                            |                            |
|--------------------------------|----------------------------|----------------------------|----------------------------|-----------------------------|-----------------------------|-----------------------------|----------------------------|----------------------------|
| e                              | 0.08                       | 0.25                       | 0.5                        | 1                           | 2                           | 4                           | 6                          | 24                         |
| <sup>99m</sup> Tc-QRC solution |                            |                            |                            |                             |                             |                             |                            |                            |
| blood                          | 2.74 ± 0.71                | 1.75 ± 0.41                | 0.83 ± 0.17                | 0.80 ± 0.21                 | 0.79 ± 0.22                 | 0.91 ± 0.34                 | 1.45 ± 0.05                | 0.36 ± 0.09                |
| Muscle                         | 0.37 ± 0.05                | 1.01 ± 0.18                | 1.36 ± 0.08                | 1.66 ± 0.36                 | 2.98 ± 0.73                 | 1.09 ± 0.04                 | 0.66 ± 0.08                | 0.24 ± 0.01                |
| Tumor                          | 0.78 ± 0.11                | 1.05 ± 0.26                | 1.75 ± 0.09                | 1.77 ± 0.04                 | 3.32 ± 0.42                 | 1.13 ± 0.03                 | 0.83 ± 0.01                | 0.45 ± 0.02                |
| T/NT                           | 2.11 ± 0.16                | 1.04 ± 0.08                | 1.29 ± 0.13                | 1.07 ± 0.11                 | 1.11 ± 0.09                 | 1.04 ± 0.05                 | 1.26 ± 0.13                | 1.88 ± 0.21                |
| T/blood                        | 0.28 ± 0.02                | 0.60 ± 0.06                | 2.11 ± 0.12                | 2.21 ± 0.22                 | 4.20 ± 0.28                 | 1.24 ± 0.16                 | 0.57 ± 0.03                | 1.25 ± 0.14                |
| <sup>99m</sup> Tc-QRC-NOVs     |                            |                            |                            |                             |                             |                             |                            |                            |
| Blood                          | 4.10 ± 0.71 <sup>a</sup>   | 3.75 ± 0.77 <sup>a</sup>   | 2.69 ± 0.44 <sup>a</sup>   | 1.30 ± 0.11 <sup>a</sup>    | 1.00 ± 0.29 <sup>a</sup>    | 2.10 ± 0.69 <sup>a</sup>    | 1.47 ± 0.31                | 0.60 ± 0.09 <sup>a</sup>   |
| Muscle                         | 0.88 ± 0.11 <sup>a</sup>   | 1.30 ± 0.12 <sup>a</sup>   | 1.61 ± 0.09 <sup>a</sup>   | 2.01 ± 0.31 <sup>a</sup>    | 3.01 ± 0.97                 | 1.67 ± 0.15 <sup>a</sup>    | 1.09 ± 0.15 <sup>a</sup>   | 0.76 ± 0.01 <sup>a</sup>   |
| Tumor                          | 2.78 ± 0.39 <sup>a</sup>   | 4.19 ± 0.97 <sup>a</sup>   | 5.19 ± 1.37 <sup>a</sup>   | 7.81 ± 2.03 <sup>a</sup>    | 9.61 ± 3.16 <sup>a</sup>    | 7.00 ± 1.39 <sup>a</sup>    | 5.64 ± 0.94 <sup>a</sup>   | 2.46 ± 0.07 <sup>a</sup>   |
| T/NT                           | 3.16 ± 0.63 <sup>a</sup>   | 3.22 ± 0.71 <sup>a</sup>   | 3.22 ± 0.42 <sup>a</sup>   | 3.89 ± 0.54 <sup>a</sup>    | 3.19 ± 0.62 <sup>a</sup>    | 4.19 ± 0.31 <sup>a</sup>    | 5.17 ± 0.83 <sup>a</sup>   | 3.24 ± 0.52 <sup>a</sup>   |
| T/blood                        | 0.68 ± 0.15 <sup>a</sup>   | 1.12 ± 0.11 <sup>a</sup>   | 1.93 ± 0.16                | 6.01 ± 0.87 <sup>a</sup>    | 9.61 ± 1.23 <sup>a</sup>    | 3.33 ± 0.58 <sup>a</sup>    | 3.84 ± 0.63 <sup>a</sup>   | 4.10 ± 0.81 <sup>a</sup>   |
| <sup>99m</sup> Tc-QRC-SeNOVs   |                            |                            |                            |                             |                             |                             |                            |                            |
| Blood                          | 5.74 ± 0.61 <sup>a,b</sup> | 4.75 ± 0.70 <sup>a,b</sup> | 3.80 ± 0.41 <sup>a,b</sup> | 2.80 ± 0.29 <sup>a,b</sup>  | 2.79 ± 0.20 <sup>a,b</sup>  | 2.91 ± 0.40 <sup>a,b</sup>  | 2.47 ± 0.60 <sup>a,b</sup> | 1.27 ± 0.09 <sup>a,b</sup> |
| Muscle                         | 0.97 ± 0.06 <sup>a</sup>   | 1.52 ± 0.39 <sup>a,b</sup> | 2.60 ± 0.27 <sup>a,b</sup> | 3.01 ± 0.97 <sup>a,b</sup>  | 3.67 ± 0.47 <sup>a,b</sup>  | 2.00 ± 0.15 <sup>a,b</sup>  | 1.87 ± 0.12 <sup>a,b</sup> | 0.99 ± 0.02 <sup>a,b</sup> |
| Tumor                          | 4.83 ± 0.47 <sup>a,b</sup> | 5.61 ± 0.27 <sup>a,b</sup> | 8.03 ± 2.14 <sup>a,b</sup> | 15.74 ± 1.36 <sup>a,b</sup> | 12.74 ± 3.79 <sup>a,b</sup> | 11.00 ± 2.78 <sup>a,b</sup> | 7.93 ± 0.97 <sup>a,b</sup> | 4.76 ± 0.89 <sup>a,b</sup> |
| T/NT                           | 4.98 ± 0.76 <sup>a,b</sup> | 3.69 ± 0.72 <sup>a</sup>   | 3.09 ± 0.41 <sup>a</sup>   | 5.23 ± 0.61 <sup>a,b</sup>  | 3.47 ± 0.55 <sup>a</sup>    | 5.50 ± 0.92 <sup>a,b</sup>  | 4.24 ± 0.66 <sup>a,b</sup> | 4.81 ± 0.83 <sup>a,b</sup> |
| T/blood                        | 0.84 ± 0.26 <sup>a,b</sup> | 1.18 ± 0.35 <sup>a</sup>   | 2.11 ± 0.31                | 5.62 ± 0.68 <sup>a</sup>    | 4.57 ± 0.84 <sup>a,b</sup>  | 3.78 ± 0.67 <sup>a</sup>    | 3.21 ± 0.56 <sup>a,b</sup> | 3.75 ± 0.49 <sup>a</sup>   |

<sup>99m</sup>Tc: technetium-99m; QRC: quercetin; NOVs: novasomes; SeNOVs: selenium-plated novasomes; T/NT (target/non-target ratio) = tumor muscle/normal muscle. Listed data are mean values ± SD (n = 3). Using one-way ANOVA followed by Tukey post-hoc test. <sup>a</sup> *p* < 0.05 versus <sup>99m</sup>Tc-QRC solution. <sup>b</sup> *p* < 0.05 versus <sup>99m</sup>Tc-QRC-NOVs.
